# Supplementary material for: Enhanced autopsy triage (EA-Triage) in drug-related deaths: integrating quick toxicological analysis and postmortem computed tomography
Source: Springer Nature journal article supplement (doi:10.1007/s12024-024-00819-2), 2024-04-29
Supplement: MOESM1 [file 27034728]

**Enhanced Autopsy Triage (EA-Triage) in Drug-Related Deaths: Integrating Quick Toxicological Analysis and Postmortem Computed Tomography, Forensic Science, Medicine, and Pathology**

**Online Resource 1:** Standardized CT description template; Detailed review of all organs divided into sections, as well as an assessment of both skeleton and soft tissues

|             |      |                        |
|-------------|------|------------------------|
| Case number | Name | Social Security number |
|-------------|------|------------------------|

| CT description                                                                                                                                 | Forensic radiographer /<br>Board certified forensic pathologist | Radiologist |
|------------------------------------------------------------------------------------------------------------------------------------------------|-----------------------------------------------------------------|-------------|
| <b>Head</b><br>Skeletal: <input type="checkbox"/> NAD<br>Soft tissue: <input type="checkbox"/> NAD                                             |                                                                 |             |
| <b>Neck</b><br>Skeletal: <input type="checkbox"/> NAD<br>Soft tissue: <input type="checkbox"/> NAD                                             |                                                                 |             |
| <b>Thorax</b><br>Soft tissue: <input type="checkbox"/> NAD                                                                                     |                                                                 |             |
| <b>Abdomen</b><br>Soft tissue: <input type="checkbox"/> NAD                                                                                    |                                                                 |             |
| <b>Pelvis</b><br>Soft tissue: <input type="checkbox"/> NAD                                                                                     |                                                                 |             |
| <b>Axial skeleton</b><br>Thorax: <input type="checkbox"/> NAD<br>Columna: <input type="checkbox"/> NAD<br>Pelvis: <input type="checkbox"/> NAD |                                                                 |             |
| <b>Upper extremities</b><br>Skeletal: <input type="checkbox"/> NAD<br>Soft tissue: <input type="checkbox"/> NAD                                |                                                                 |             |
| <b>Lower extremities</b><br>Skeletal: <input type="checkbox"/> NAD<br>Soft tissue: <input type="checkbox"/> NAD                                |                                                                 |             |

NAD: No abnormalities detected

| Costa fractures |         |      |       |      |         |       |
|-----------------|---------|------|-------|------|---------|-------|
| DXT             |         |      | SIN   |      |         |       |
| Front           | Lateral | Back | Costa | Back | Lateral | Front |
|                 |         |      | 1     |      |         |       |
|                 |         |      | 2     |      |         |       |
|                 |         |      | 3     |      |         |       |
|                 |         |      | 4     |      |         |       |
|                 |         |      | 5     |      |         |       |
|                 |         |      | 6     |      |         |       |
|                 |         |      | 7     |      |         |       |
|                 |         |      | 8     |      |         |       |
|                 |         |      | 9     |      |         |       |
|                 |         |      | 10    |      |         |       |
|                 |         |      | 11    |      |         |       |
|                 |         |      | 12    |      |         |       |

DXT: dexter, Sin: sinister, X: Fracture (new), Seq: Fracture sequelae, Callus: Fracture with callus formation

|       |            |
|-------|------------|
| Date: | Signature: |
|-------|------------|
