# Supplementary material for: Enhanced autopsy triage (EA-Triage) in drug-related deaths: integrating quick toxicological analysis and postmortem computed tomography
Source: Springer Nature journal article supplement (doi:10.1007/s12024-024-00819-2), 2024-04-29
Supplement: MOESM2 [file 27034728]

**Enhanced Autopsy Triage (EA-Triage) in Drug-Related Deaths: Integrating Quick Toxicological Analysis and Postmortem Computed Tomography, Forensic Science, Medicine, and Pathology**

**Online Resource 2:** List of the 88 drugs and metabolites included in the quantification of the QTA together with ethanol and carbon monoxide. All quantified results gave a postmortem concentration.

|                             |                                          |
|-----------------------------|------------------------------------------|
| Agomelatin                  | Lysergic acid diethylamide (LSD)         |
| Alprazolam                  | 3,4-Methylenodioxymethamphetamine (MDMA) |
| Amfetamin                   | Melatonin                                |
| Amitriptylin                | Metamfetamin                             |
| Amlodipin                   | Metformin                                |
| Aripiprazol                 | Methadon                                 |
| Atenolol                    | Methylphenidat                           |
| Baclofen                    | Metoclopramide                           |
| Benzoylcegonin              | Metoprolol                               |
| Beta-hydroxybutyrate        | Metotrexat                               |
| Bisoprolol                  | Mianserin                                |
| Bromazepam                  | Midazolam                                |
| Buprenorphin                | Mirtazapine                              |
| Carbamazepine 10,11-epoxide | Morphine                                 |
| Carvediol                   | Morphin-6-beta-D-glucuronid              |
| Chlordiazepoxid             | Nitrazepam                               |
| Chlorprothixen              | Norclomipramin                           |
| Citalopram (+ escitalopram) | Nordazepam                               |
| Clomipramin                 | Nortriptyline                            |
| Clonazepam                  | Olanzapine                               |
| 7-amino-clonazepam          | Orphenadrine                             |
| Clozapin                    | Oxazepam                                 |
| Cocain                      | O-Demethyltramadol                       |
| Codein                      | O-Demethylvenlafaxin                     |
| Cyclizin                    | Oxycodone                                |
| Dehydroaripiprazol          | Paliperidon                              |
| Demoxepam                   | Paracetamol                              |
| Desimipramin                | Paroxetine                               |
| Diazepam                    | Phenobarbital                            |
| Duloxetine                  | Pregabalin                               |
| Felodipine                  | Promethazine                             |
| Fentanyl                    | Propranolol                              |
| Fluoxetin                   | Quetiapine                               |
| Gabapentin                  | Risperidone                              |
| GHB                         | Salicylsyre                              |
| Haloperidol                 | Sertraline                               |
| Ibuprofen                   | THC-COOH-glucuronid                      |
| Imipramine                  | Tramadol                                 |
| Ketamin                     | Venlafaxine                              |
| Ketobemidone                | Verapamil                                |
| Lamotrigine                 | Vortioxetine                             |
| Lercanidipine               | Zolpidem                                 |
| Levetiracetam               | Zopiclon                                 |
| Levomepromazine             | Zuclopthixol                             |
