# Supplementary material for: Enhanced autopsy triage (EA-Triage) in drug-related deaths: integrating quick toxicological analysis and postmortem computed tomography
Source: Springer Nature journal article supplement (doi:10.1007/s12024-024-00819-2), 2024-04-29
Supplement: MOESM3 [file 27034728]

**Enhanced Autopsy Triage (EA-Triage) in Drug-Related Deaths: Integrating Quick Toxicological Analysis and Postmortem Computed Tomography, Forensic Science, Medicine, and Pathology**

| <b>Online Resource 3: ICD-10 code for underlying COD categorization adjusted for manner of death</b> |                                                                                                     |                    |                                                                                                                            |
|------------------------------------------------------------------------------------------------------|-----------------------------------------------------------------------------------------------------|--------------------|----------------------------------------------------------------------------------------------------------------------------|
| <b>COD category</b>                                                                                  |                                                                                                     | <b>ICD-10 code</b> | <b>ICD-10 code description</b>                                                                                             |
| Intoxication with illegal and prescription drugs                                                     | Intoxication by and exposure to narcotics and psychodysleptics [hallucinogens]                      | <b>X42</b>         | Accidental poisoning by and exposure to narcotics and psychodysleptics [hallucinogens], not elsewhere classified           |
|                                                                                                      | Intoxication by and exposure to narcotics and psychodysleptics [hallucinogens]                      | <b>X62</b>         | Intentional self-poisoning by and exposure to narcotics and psychodysleptics [hallucinogens], not elsewhere classified     |
|                                                                                                      | Intoxication by and exposure to narcotics and psychodysleptics [hallucinogens]                      | <b>Y12</b>         | Poisoning by and exposure to narcotics and psychodysleptics [hallucinogens], not elsewhere classified, undetermined intent |
|                                                                                                      | Intoxication by and exposure to other and unspecified drugs, medicaments, and biological substances | <b>X44</b>         | Accidental poisoning by and exposure to other and unspecified drugs, medicaments, and biological substances                |
|                                                                                                      | Intoxication by and exposure to other and unspecified drugs, medicaments, and biological substances | <b>X64</b>         | Intentional self-poisoning by and exposure to other and unspecified drugs, medicaments, and biological substances          |
|                                                                                                      | Intoxication by and exposure to other and unspecified drugs, medicaments, and biological substances | <b>Y14</b>         | Poisoning by and exposure to other and unspecified drugs, medicaments and biological substances, undetermined intent       |
| Diabetic ketoacidosis                                                                                |                                                                                                     | <b>E141</b>        | Unspecified diabetes mellitus with ketoacidosis                                                                            |
| Alcoholic ketoacidosis                                                                               |                                                                                                     | <b>F101 + E872</b> | F101: Mental and behavioral disorders due to use of alcohol: harmful use<br>E872: Unspecified acidosis                     |
| Firearms                                                                                             |                                                                                                     | <b>X72</b>         | Intentional self-harm by handgun discharge                                                                                 |
| Hanging                                                                                              |                                                                                                     | <b>X70</b>         | Intentional self-harm by hanging, strangulation and suffocation                                                            |
| Fire exposure                                                                                        |                                                                                                     | <b>X00</b>         | Exposure to uncontrolled fire in building or structure                                                                     |
|                                                                                                      |                                                                                                     | <b>X09</b>         | Exposure to unspecified smoke, fire and flames                                                                             |
| Traffic fatality                                                                                     |                                                                                                     | <b>X81</b>         | Intentional self-harm by jumping or lying before moving object                                                             |
